# Supplementary material
Source: Frontiers journal article supplement (https://www.frontiersin.org/articles/416160)
Supplement: Data_Sheet_1.pdf [file Data_Sheet_1.pdf]

### Seismic Assessment based on GEM Building Taxonomy v2.0

Project \_\_\_\_\_  
 Inspection time \_\_\_\_\_  
 Start (local time) \_\_\_\_\_ : \_\_\_\_\_ (hh/mm)      Inspection duration \_\_\_\_\_ (min)  
 Completed by \_\_\_\_\_  
 Function  Structural eng.  
 Building official

Date \_\_\_\_\_ / \_\_\_\_\_ / \_\_\_\_\_ (dd/mm/yyyy)  
 Areas inspected  
 Exterior and interior  
 Exterior only  
 Architect  
 Student

**General building information**

Building name \_\_\_\_\_ Street name and nb \_\_\_\_\_  
 Neighborhood \_\_\_\_\_ City \_\_\_\_\_ Zip/Pcode \_\_\_\_\_  
 State \_\_\_\_\_ Country \_\_\_\_\_  
 Coordinates \_\_\_\_\_ Longitude X \_\_\_\_\_ Latitude Y \_\_\_\_\_

**Building information**

|                                          |                                                     |                                                                                         |
|------------------------------------------|-----------------------------------------------------|-----------------------------------------------------------------------------------------|
| <b>OCCUPANCY</b>                         | <b>Mixed use</b>                                    | <b>DATE OF CONSTRUCTION OR RETROFIT</b>                                                 |
| Unknown occupancy type                   | Mixed, unknown type                                 | Year unknown                                                                            |
| <b>Residential</b>                       | Mostly residential and commercial                   | Exact date of construction or retrofit                                                  |
| Residential, unknown type                | Mostly commercial and residential                   | Upper and lower bound for the date of construction or retrofit: between _____ and _____ |
| Single dwelling                          | Mostly commercial and industrial                    | Latest possible date of construction retrofit                                           |
| Multi-unit, unknown type                 | Mostly residential and industrial                   | Approximate date of construction or retrofit                                            |
| 2 Units (duplex)                         | Mostly industrial and commercial                    |                                                                                         |
| 3-4 Units                                | Mostly industrial and residential                   |                                                                                         |
| 5-9 Units                                | <b>Industrial</b>                                   |                                                                                         |
| 10-19 Units                              | Industrial, unknown type                            |                                                                                         |
| 20-49 Units                              | Heavy industrial                                    |                                                                                         |
| 50+ Units                                | Light industrial                                    |                                                                                         |
| Temporary lodging                        | <b>Assembly</b>                                     |                                                                                         |
| Institutional housing                    | Assembly, unknown type                              |                                                                                         |
| Mobile home                              | Religious gathering                                 |                                                                                         |
| Informal housing                         | Arena                                               |                                                                                         |
| <b>Commercial and public</b>             | Cinema or concert hall                              |                                                                                         |
| Commercial and public, unknown type      | Other gatherings                                    |                                                                                         |
| Retail trade                             | <b>Government</b>                                   |                                                                                         |
| Wholesale trade and storage (warehouse)  | Government, unknown type                            |                                                                                         |
| Offices, professional/technical services | Government, general services                        |                                                                                         |
| Hospital/medical clinic                  | Government, emergency response                      |                                                                                         |
| Entertainment                            | <b>Education</b>                                    |                                                                                         |
| Public building                          | Education, unknown type                             |                                                                                         |
| Covered parking garage                   | Pre-school facility                                 |                                                                                         |
| Bus station                              | School                                              |                                                                                         |
| Railway station                          | College/university, offices and/or classrooms       |                                                                                         |
| Airport                                  | College/university, research facilities and/or labs |                                                                                         |
| Recreation and leisure                   | Other occupancy type                                |                                                                                         |

  

|                                     |                                            |                                                                                       |
|-------------------------------------|--------------------------------------------|---------------------------------------------------------------------------------------|
| <b>BUILDING POSITION IN A BLOCK</b> | <b>NUMBER OF STORY</b>                     |  |
| Unknown building position           | Number of storeys unknown                  |                                                                                       |
| Detached building                   | Number of storeys above ground             |                                                                                       |
| Adjoining building(s) on one side   | Range of number of storeys above ground    |                                                                                       |
| Adjoining building(s) on two sides  | Exact number of storeys above ground       |                                                                                       |
| Adjoining buildings on three sides  | Approximate number of storeys above ground |                                                                                       |
| Corner building                     | Number of storeys below ground             |                                                                                       |
| <b>BUILDING HEIGHT</b>              | Number of storeys below ground unknown     |                                                                                       |
| Height in meters _____ m            | Range of number of storeys below ground    |                                                                                       |
| Building tilt _____                 | Exact number of storeys below ground       |                                                                                       |

  

|                                        |
|----------------------------------------|
| <b>EXPOSURE AND CONSEQUENCES</b>       |
| Number of Day Occupants                |
| Number of Night Occupants              |
| Number of Transit Occupants            |
| Number of Dwelling                     |
| Plan Area (m <sup>2</sup> )            |
| Replacement cost (per m <sup>2</sup> ) |
| Number of Fatalities                   |
| Number of Injured                      |
| Number Missing                         |

  

inter-storey number

|      |                             |  |
|------|-----------------------------|--|
| Roof |                             |  |
| N3   | 4 <sup>th</sup> floor       |  |
| N2   | 3 <sup>rd</sup> floor       |  |
| N1   | 2 <sup>nd</sup> floor       |  |
| N1   | 1 <sup>st</sup> floor       |  |
| S1   | 1 <sup>st</sup> level under |  |
| S2   | 2 <sup>nd</sup> level under |  |

*Example of local nomenclature:*



**General building damage**

|                                                                                     |                                                                                                                                                                                                                                          |                                                                                                                                                 |
|-------------------------------------------------------------------------------------|------------------------------------------------------------------------------------------------------------------------------------------------------------------------------------------------------------------------------------------|-------------------------------------------------------------------------------------------------------------------------------------------------|
| Grade 1: Negligible to Slight Damage (<10%)                                         | <b>Damage to building of reinforced concrete</b>                                                                                                                                                                                         | <b>Damage to masonry buildings</b>                                                                                                              |
| Grade 2: Moderate Damage (10-30%)                                                   | Grade 1: Negligible to slight damage (no structural damage, slight non-structural damage)                                                                                                                                                | Grade 1: Negligible to slight damage (no structural damage, slight non-structural damage)                                                       |
| Grade 3: Substantial to Heavy Damage (30-60%)                                       | Fine cracks in plaster over frame members or in walls at the base.                                                                                                                                                                       | Hair-line cracks in very few walls. Fall of small pieces of plaster only. Fall of loose stones from upper parts of buildings in very few cases. |
| Grade 4: Very Heavy Damage (60-90%)                                                 | Fine cracks in partitions and infills.                                                                                                                                                                                                   |                                                                                                                                                 |
| Grade 5: Destruction (>90%)                                                         | <b>Grade 2: Moderate damage</b> (slight structural damage, moderate non-structural damage)                                                                                                                                               | <b>Grade 2: Moderate damage</b> (slight structural damage, moderate non-structural damage)                                                      |
| <b>Is there localised damage?</b>                                                   | Cracks in columns and beams of frames and in structural walls.                                                                                                                                                                           | Cracks in many walls. Fall of fairly large pieces of plaster.                                                                                   |
| No                                                                                  | Cracks in partition and infill walls; fall of brittle cladding and plaster.                                                                                                                                                              | Partial collapse of chimneys.                                                                                                                   |
| Yes (if yes please precise floor nb, location)                                      | Falling mortar from the joints of wall panels.                                                                                                                                                                                           |                                                                                                                                                 |
| Floor number: _____                                                                 | <b>Grade 3: Substantial to heavy damage</b> (moderate structural damage, heavy non-structural damage)                                                                                                                                    | <b>Grade 3: Substantial to heavy damage</b> (moderate structural damage, heavy non-structural damage)                                           |
| Location: _____                                                                     | Cracks in columns and beam column joints of frames at the base and at joints of coupled walls. Spalling of concrete cover, buckling of reinforced rods. Large cracks in partition and infill walls, failure of individual infill panels. | Large and extensive cracks in most walls.                                                                                                       |
|  |                                                                                                                                                                                                                                          | Roof tiles detach. Chimneys fracture at the roof line; failure of individual non-structural elements (partitions, gable walls).                 |
|                                                                                     | <b>Grade 4: Very heavy damage</b> (heavy structural damage, very heavy non-structural damage)                                                                                                                                            | <b>Grade 4: Very heavy damage</b> (heavy structural damage, very heavy non-structural damage)                                                   |
|                                                                                     | Large cracks in structural elements with compression failure of concrete and fracture of rebars; bond failure of beam reinforced bars; tilting of columns.                                                                               | Serious failure of walls; partial structural failure of roofs and floors.                                                                       |
|                                                                                     | Collapse of a few columns or of a single upper floor.                                                                                                                                                                                    |                                                                                                                                                 |
|                                                                                     | <b>Grade 5: Destruction</b> (very heavy structural damage)                                                                                                                                                                               | <b>Grade 5: Destruction</b> (very heavy structural damage)                                                                                      |
|                                                                                     | Collapse of ground floor or parts (e.g. wings) of buildings.                                                                                                                                                                             | Total or near total collapse.                                                                                                                   |

### Structural System

| Direction                  |  |                         |
|----------------------------|--|-------------------------|
| Direction X (Longitudinal) |  | Unspecified direction   |
|                            |  | Parallel to street      |
| Direction Y (Transverse)   |  | Unspecified direction   |
|                            |  | Perpendicular to street |

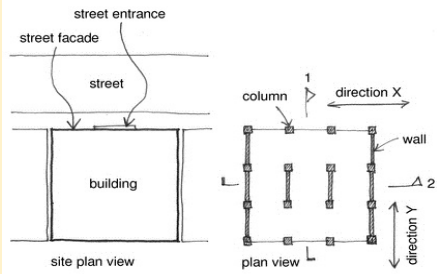

| Material                        |                                        |                                    |                               |
|---------------------------------|----------------------------------------|------------------------------------|-------------------------------|
| Concrete, unknown reinforcement | Unknown material                       | Unknown concrete technology        |                               |
|                                 | Concrete, unreinforced                 | Cast-in place concrete             |                               |
|                                 | Concrete, reinforced                   | Precast concrete                   |                               |
|                                 | Concrete, composite with steel section | Cast-in-place prestressed concrete |                               |
|                                 |                                        | Precast prestressed concrete       |                               |
| Steel                           |                                        | Steel, unknown                     |                               |
|                                 |                                        | Cold-formed steel members          |                               |
|                                 |                                        | Hot-rolled steel members           |                               |
| Metal(except steel)             |                                        | Steel, other                       |                               |
|                                 | Masonry, unknown reinforcement         | Masonry unit, unknown              |                               |
|                                 | Masonry, unreinforced                  | Adobe blocks                       |                               |
|                                 | Masonry, confined                      | Stone, unknown technology          |                               |
|                                 | Masonry, reinforced                    |                                    | Dressed stone                 |
|                                 |                                        |                                    | Fired clay unit, unknown type |
|                                 |                                        |                                    | Fire clay bricks              |
|                                 |                                        |                                    | Concrete blocks, unknown type |
|                                 |                                        |                                    | Concrete block, solid         |
|                                 | Wood                                   |                                    | Concrete blocks, hollow       |
|                                 |                                        | Masonry unit, other                |                               |
| Material other                  |                                        |                                    |                               |

| Lateral-load resisting system |                                                  |
|-------------------------------|--------------------------------------------------|
| L                             | T                                                |
|                               | LLRS Lateral-load resisting system               |
|                               | Unknown lateral load-resisting system            |
|                               | No lateral load-resisting system                 |
|                               | Moment frame                                     |
|                               | Infilled frame                                   |
|                               | Braced frame                                     |
|                               | Post and Beam                                    |
|                               | Wall                                             |
|                               | Dual frame-wall system                           |
|                               | Flat slab/plate or waffle slab                   |
|                               | Infilled flat slab/plate or infilled waffle slab |
|                               | Hybrid lateral load-resisting system             |
|                               | Other lateral load-resisting system              |

#### Structural Irregularity

| STR_IRREG | Regular or irregular            |
|-----------|---------------------------------|
|           | Unknown structural irregularity |
|           | Regular structure               |
|           | Irregular structure             |

The user can choose a maximum of two vertical and two plan irregularities for a building. However, if a building has two irregularities of the same type (plan/vertical), the user needs to prioritize them by identifying the primary irregularity first and the secondary irregularity next.

| STR_HZIR_P                                 | P | S                       |
|--------------------------------------------|---|-------------------------|
| Plan irregularity-primary                  |   | No irregularity         |
| STR_HZIR_S                                 |   | Torsion eccentricity    |
|                                            |   | Re-entrant corner       |
|                                            |   | Other plan irregularity |
| STR_VEIR_P                                 |   | No irregularity         |
| Vertical structural irregularity - primary |   | Soft storey             |
| STR_VEIR_S                                 |   | Short column            |
|                                            |   | Cripple wall            |
|                                            |   | Pounding potential      |
|                                            |   | Setback                 |

#### Structural system (Severity of Damage)

|                                      |
|--------------------------------------|
| Negligible to Slight Damage (<10%)   |
| Moderate Damage (10-30%)             |
| Substantial to Heavy Damage (30-60%) |
| Very Heavy Damage (60-90%)           |
| Destruction (>90%)                   |

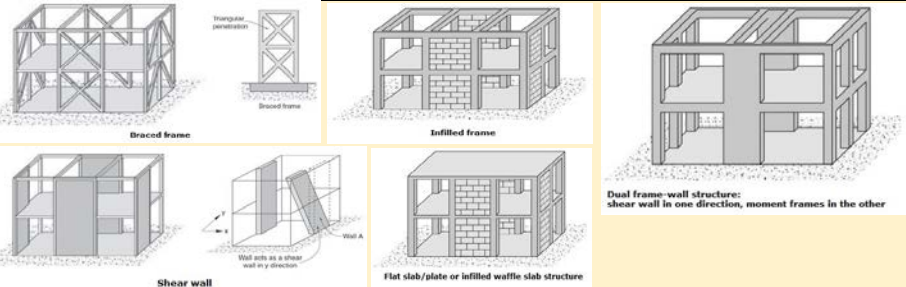

### Exterior Attributes

| Roof                      |                                      |
|---------------------------|--------------------------------------|
| ROOF_SHAPE                | Roof shape                           |
|                           | Unknown roof shape                   |
|                           | Flat                                 |
|                           | Pitched                              |
|                           | Sawtooth                             |
|                           | Curved                               |
|                           | Complex regular                      |
|                           | Complex irregular                    |
|                           | Roof shape, other                    |
| Roof (Severity of Damage) |                                      |
|                           | Negligible to Slight Damage (<10%)   |
|                           | Moderate Damage (10-30%)             |
|                           | Substantial to Heavy Damage (30-60%) |
|                           | Very Heavy Damage (60-90%)           |
|                           | Destruction (>90%)                   |

| ROOF_COVMAT   |                                                               |
|---------------|---------------------------------------------------------------|
| Roof covering | Roof covering                                                 |
|               | Unknown roof covering                                         |
|               | Concrete roof without additional covering                     |
|               | Heavy roof covering (slate, stone slab/clay or concrete tile) |
|               | Light roof covering (metal tile, shingle, membrane)           |
|               | Vegetative/Earthen roof covering                              |
|               | Solar panelled roofs                                          |
|               | Roof covering, other                                          |
| ROOF_CONN     |                                                               |
|               | Roof connection                                               |
|               | Roof-wall diaphragm connection unknown                        |
|               | Roof-wall diaphragm connection not provided                   |
|               | Roof-wall diaphragm connection present                        |
|               | Roof tie-down not provided                                    |
|               | Roof tie-down present                                         |

| ROOFSYSTYP       |                                                       |
|------------------|-------------------------------------------------------|
| Roof system type | Roof system type                                      |
|                  | Roof material, unknown                                |
|                  | Concrete roof, unknown                                |
|                  | Cast-in-place beamless reinforced concrete roof       |
|                  | Cast-in-place beam-supported reinforced concrete roof |
|                  | Precast concrete roof with concrete topping           |
|                  | Masonry roof, unknown                                 |
|                  | Composite masonry and concrete roof system            |
|                  | Metal roof, unknown                                   |
|                  | Metal beams or trusses supporting light roofing       |
|                  | Metal roof beams supporting precast concrete slabs    |
|                  | Composite steel roof deck and concrete slab           |
|                  | Wooden roof                                           |
|                  | Fabric roof                                           |
|                  | Roof material, other                                  |

| Exterior walls/Façade               |                                         |
|-------------------------------------|-----------------------------------------|
| Unknown material of exterior walls  | Concrete exterior walls                 |
|                                     | Concrete and masonry                    |
|                                     | Masonry exterior walls                  |
|                                     | Steel and masonry                       |
|                                     | Glass exterior walls                    |
|                                     | Metal exterior walls                    |
|                                     | Vegetative exterior walls               |
|                                     | Wooden exterior walls                   |
|                                     | Plastic/vinyl exterior walls, various   |
|                                     | Cerment-based boards for exterior walls |
|                                     | Other                                   |
| Exterior walls (Severity of Damage) |                                         |
|                                     | Negligible to Slight Damage (<10%)      |
|                                     | Moderate Damage (10-30%)                |
|                                     | Substantial to Heavy Damage (30-60%)    |
|                                     | Very Heavy Damage (60-90%)              |
|                                     | Destruction (>90%)                      |

| FLOOR_MAT             |                                                                  |
|-----------------------|------------------------------------------------------------------|
| Floor system material | No elevated or suspended floor material (single-storey building) |
|                       | Floor, material, unknown                                         |
|                       | Concrete floor, unknown                                          |
|                       | Cast-in-place beamless reinforced concrete floor                 |
|                       | Cast-in-place beam-supported reinforced concrete floor           |
|                       | Precast concrete floor with reinforced concrete topping          |
|                       | Precast concrete floor without reinforced concrete topping       |
|                       | Masonry floor, unknown                                           |
|                       | Metal floor, unknown                                             |
|                       | Metal beams, trusses, or joists supporting light flooring        |
|                       | Metal floor beams supporting precast concrete slabs              |
|                       | Composite steel deck and concrete slab                           |
|                       | Composite cast-in-place RC and masonry floor system              |
|                       | Wooden floor, unknown                                            |
|                       | Floor material, other                                            |
| FLOOR_CONN            |                                                                  |
|                       | Floor connections                                                |
|                       | Floor-wall diaphragm connection unknown                          |
|                       | Floor-wall diaphragm connection not provided                     |
|                       | Floor-wall diaphragm connection present                          |

| Foundation system |                                           |
|-------------------|-------------------------------------------|
| FOUNDN_SYS        | Foundation system                         |
|                   | Unknown foundation system                 |
|                   | Shallow foundation, with lateral capacity |
|                   | Shallow foundation, no lateral capacity   |
|                   | Deep foundation, with lateral capacity    |
|                   | Deep foundation, no lateral capacity      |
|                   | Foundation, other                         |

| Soil type          |                                        |
|--------------------|----------------------------------------|
|                    | Very soft clay                         |
|                    | Silt or clay                           |
|                    | Granular loose                         |
|                    | Granular compact                       |
|                    | Rock                                   |
| Zone Mexican codes |                                        |
|                    | Firm soil (Zone I)                     |
|                    | Transition (Zone II)                   |
|                    | Soft-soil (Zone IIIa, b, c or d) (ple) |

A map of Mexico is shown with different regions shaded to represent various soil zones as defined in the table above.

**Non-structural elements**

**NON-STRUCTURAL WALL/ PARAPETS**

Does the building have this component?  No  Yes (if yes, please fill the following information) Repair price

| Material                                         | Type of damage                          | Repair price |
|--------------------------------------------------|-----------------------------------------|--------------|
| <input type="checkbox"/> Cast in place concrete  | Parapet cracking                        |              |
| <input type="checkbox"/> Hollow concrete block   | Parapet crushing                        |              |
| <input type="checkbox"/> Solid concrete block    | Parapet locally falling out             |              |
| <input type="checkbox"/> Hollow fired clay block | Parapet collapsed                       |              |
| <input type="checkbox"/> Solid brick             | Non-structural wall cracking            |              |
| <b>Sesimic performance features</b>              |                                         |              |
| <input type="checkbox"/> No reinforcement        | Non-structural wall crushing            |              |
| <input type="checkbox"/> Steel reinforcement     | Non-structural wall locally falling out |              |
| <input type="checkbox"/> Steel reinforcement     | Non-structural wall collapsed           |              |
| Total cost to repair this component \$           |                                         |              |

**EXTERIOR WINDOWS/GLAZING**

Does the building have this component?  No  Yes (if yes, please fill the following information) Repair price

| Material                                 | Type of damage   | Repair price |
|------------------------------------------|------------------|--------------|
| <input type="checkbox"/> Wood frame      | Cracking         |              |
| <input type="checkbox"/> Steel frame     | Frame distortion |              |
| <input type="checkbox"/> Aluminium frame | Fall out         |              |
| <input type="checkbox"/> Other:          | Other:           |              |
| Total cost to repair this component \$   |                  |              |

**STAIRS**

Does the building have this component?  No  Yes (if yes, please fill the following information) Repair price

| Material                                                 | Type of damage                                                              | Repair price |
|----------------------------------------------------------|-----------------------------------------------------------------------------|--------------|
| <input type="checkbox"/> Prefabricated steel             | Non structural damage, local steel yielding                                 |              |
| <input type="checkbox"/> Precast concrete                | Local concrete cracking, localized concrete spalling                        |              |
| <input type="checkbox"/> Cast-in-place concrete          | Localized steel yielding                                                    |              |
| <input type="checkbox"/> Other:                          | Buckling of steel, weld cracking                                            |              |
| <b>Sesimic performance features</b>                      |                                                                             |              |
| <input type="checkbox"/> Particular connection detailing | Extensive concrete cracking, concrete crushing                              |              |
|                                                          | Extensive concrete cracking, concrete crushing, buckling of rebar           |              |
|                                                          | Loss of live load capacity. Connection and or weld fracture                 |              |
|                                                          | Loss of live load capacity. Extensive concrete crushing, connection failure |              |
|                                                          | Loss of live load capacity                                                  |              |
| Total cost to repair this component \$                   |                                                                             |              |

**WALL PARTITION**

Does the building have this component?  No  Yes (if yes, please fill the following information) Repair price

| Material                                        | Type of damage                                                              | Repair price |
|-------------------------------------------------|-----------------------------------------------------------------------------|--------------|
| <input type="checkbox"/> Gypsum with metal stud | Non structural damage, local steel yielding                                 |              |
| <input type="checkbox"/> Gypsum with wood studs | Local concrete cracking, localized concrete spalling                        |              |
| <input type="checkbox"/> Gypsum + Wallpaper     | Localized steel yielding                                                    |              |
| <input type="checkbox"/> Gypsum + Ceramic Tile  | Buckling of steel, weld cracking.                                           |              |
| <b>Sesimic performance features</b>             |                                                                             |              |
| <input type="checkbox"/> Fixed above            | Extensive concrete cracking, concrete crushing                              |              |
| <input type="checkbox"/> Lateral braced above   | Extensive concrete cracking, concrete crushing, buckling of rebar           |              |
| <input type="checkbox"/> Fixed below            | Loss of live load capacity. Connection and or weld fracture                 |              |
|                                                 | Loss of live load capacity. Extensive concrete crushing, connection failure |              |
|                                                 | Loss of live load capacity                                                  |              |
| Total cost to repair this component \$          |                                                                             |              |

**DOORS**

Does the building have this component?  No  Yes (if yes, please fill the following information) Repair price

| Material                               | Type of damage   | Repair price |
|----------------------------------------|------------------|--------------|
| <input type="checkbox"/> Wood          | Cracking         |              |
| <input type="checkbox"/> Metal         | Crushing         |              |
|                                        | Frame distortion |              |
| Total cost to repair this component \$ |                  |              |

**SUSPENDE CEILINGS**

Does the building have this component?  No  Yes (if yes, please fill the following information) Repair price

| Type                                                  | Type of damage                      | Repair price |
|-------------------------------------------------------|-------------------------------------|--------------|
| <input type="checkbox"/> Vertical support only        | 5 % of ceiling grid and tile damage |              |
| <input type="checkbox"/> Vertical and Lateral support | 30% of ceiling grid and tile damage |              |
| <b>Sesimic performance features</b>                   |                                     |              |
| <input type="checkbox"/> Braced                       | 50% of ceiling grid and tile damage |              |
| <input type="checkbox"/> Unbraced                     | Dropped acoustical tile             |              |
|                                                       | Perimeter damage                    |              |
|                                                       | Separation of runners               |              |
| Total cost to repair this component \$                |                                     |              |

**NON-SUSPENDE CEILINGS**

Does the building have this component?  No  Yes (if yes, please fill the following information) Repair price

| Material                               | Type of damage | Repair price |
|----------------------------------------|----------------|--------------|
| <input type="checkbox"/> Plasterboard  | Cracking       |              |
| <input type="checkbox"/> Drywall       | Local spalling |              |
| <input type="checkbox"/> Other:        | Collapse       |              |
|                                        | Other:         |              |
| Total cost to repair this component \$ |                |              |

| FLOOR FINISHES                         |                               |                                                                                                             |
|----------------------------------------|-------------------------------|-------------------------------------------------------------------------------------------------------------|
| Does the building have this component? |                               | <input type="checkbox"/> No<br><input type="checkbox"/> Yes (if yes, please fill the following information) |
|                                        |                               | Repair price                                                                                                |
| Material                               | Type of damage                |                                                                                                             |
| Stone                                  | Falling from building         |                                                                                                             |
| Tile                                   | Damaged panels and connctions |                                                                                                             |
| Glass                                  | Crush                         |                                                                                                             |
| Other:                                 |                               |                                                                                                             |
|                                        |                               | Total cost to repair this component \$                                                                      |

| ELEVATORS                              |                                                                                                                                                                                                                                                                                                              |                                                                                                             |
|----------------------------------------|--------------------------------------------------------------------------------------------------------------------------------------------------------------------------------------------------------------------------------------------------------------------------------------------------------------|-------------------------------------------------------------------------------------------------------------|
| Does the building have this component? |                                                                                                                                                                                                                                                                                                              | <input type="checkbox"/> No<br><input type="checkbox"/> Yes (if yes, please fill the following information) |
|                                        |                                                                                                                                                                                                                                                                                                              | Repair price                                                                                                |
| Type                                   | Type of damage                                                                                                                                                                                                                                                                                               |                                                                                                             |
| Traction geared                        | Controller anchorage failed, and or machine anchorage failed, and or motor generator anchorage failed, and or governor anchorage failed, and or rope guard failures.                                                                                                                                         |                                                                                                             |
|                                        | Rail distortion, and or intermediate bracket separate and spread, and or counterweight bracket break or bend, and or car bracket break or bend, and or car guide shoes damaged, and or counterweight guide shoes damaged, and or counterweight frame distortion, and or tail sheave dislodged and/or twisted |                                                                                                             |
|                                        | Cab stabilizers bent, or cab walls damaged, or cab doors damaged.                                                                                                                                                                                                                                            |                                                                                                             |
|                                        | Cab ceiling damaged.                                                                                                                                                                                                                                                                                         |                                                                                                             |
| Hydraulic                              | Damaged controls.                                                                                                                                                                                                                                                                                            |                                                                                                             |
|                                        | Damaged vane and hoist-way switches, and or bent cab stabilizers, and or damaged car guide shoes.                                                                                                                                                                                                            |                                                                                                             |
|                                        | Damaged entrance and car door, and or flooring damage.                                                                                                                                                                                                                                                       |                                                                                                             |
|                                        | Oil leak in hydraulic line, and or hydraulic tank failure.                                                                                                                                                                                                                                                   |                                                                                                             |
|                                        |                                                                                                                                                                                                                                                                                                              | Total cost to repair this component \$                                                                      |

| PIPING                                 |                                     |                                                                                                             |
|----------------------------------------|-------------------------------------|-------------------------------------------------------------------------------------------------------------|
| Does the building have this component? |                                     | <input type="checkbox"/> No<br><input type="checkbox"/> Yes (if yes, please fill the following information) |
|                                        |                                     | Repair price                                                                                                |
| Material                               | Type of damage                      |                                                                                                             |
| Plastic                                | Minor leakage at flange connections |                                                                                                             |
| Copper                                 | Pipe Break                          |                                                                                                             |
| Steel                                  | Other:                              |                                                                                                             |
| Aluminium                              |                                     |                                                                                                             |
| Cast iron                              |                                     |                                                                                                             |
| Other:                                 |                                     |                                                                                                             |
| Sesimic performance features           |                                     |                                                                                                             |
| Braced                                 |                                     |                                                                                                             |
| Unbraced                               |                                     |                                                                                                             |
|                                        |                                     | Total cost to repair this component \$                                                                      |

| FIRE PROTECTION                        |                                       |                                                                                                             |
|----------------------------------------|---------------------------------------|-------------------------------------------------------------------------------------------------------------|
| Does the building have this component? |                                       | <input type="checkbox"/> No<br><input type="checkbox"/> Yes (if yes, please fill the following information) |
|                                        |                                       | Repair price                                                                                                |
| Type                                   | Type of damage                        |                                                                                                             |
| Wet pipe                               | Spraying & Dripping Leakage at joints |                                                                                                             |
| Dry pipe                               | Joints Break - Major Leakage          |                                                                                                             |
|                                        | Other:                                |                                                                                                             |
|                                        |                                       | Total cost to repair this component \$                                                                      |

| HEATING SYSTEMS                        |                                |                                                                                                             |
|----------------------------------------|--------------------------------|-------------------------------------------------------------------------------------------------------------|
| Does the building have this component? |                                | <input type="checkbox"/> No<br><input type="checkbox"/> Yes (if yes, please fill the following information) |
|                                        |                                | Repair price                                                                                                |
| Material                               | Type of damage                 |                                                                                                             |
| Unit heater                            | Sliding                        |                                                                                                             |
| Boiler                                 | Overturning. Broken/bent bolts |                                                                                                             |
| Other:                                 | Broken gas and exhaust lines   |                                                                                                             |
| Sesimic performance features           | Loss of function               |                                                                                                             |
| Unanchored                             | Other:                         |                                                                                                             |
| Anchored                               |                                |                                                                                                             |
|                                        |                                | Total cost to repair this component \$                                                                      |

| COOLING SYSTEMS                        |                                |                                                                                                             |
|----------------------------------------|--------------------------------|-------------------------------------------------------------------------------------------------------------|
| Does the building have this component? |                                | <input type="checkbox"/> No<br><input type="checkbox"/> Yes (if yes, please fill the following information) |
|                                        |                                | Repair price                                                                                                |
| Material                               | Type of damage                 |                                                                                                             |
| Packaged chiller                       | Sliding                        |                                                                                                             |
| Rofftop air cond.                      | Overturning. Broken/bent bolts |                                                                                                             |
| Other:                                 | Leaking refrigerant            |                                                                                                             |
| Sesimic performance features           | Loss of function               |                                                                                                             |
| Unanchored                             | Other:                         |                                                                                                             |
| Anchored                               |                                |                                                                                                             |
|                                        |                                | Total cost to repair this component \$                                                                      |

| DUCTS                                  |                |                                                                                                             |
|----------------------------------------|----------------|-------------------------------------------------------------------------------------------------------------|
| Does the building have this component? |                | <input type="checkbox"/> No<br><input type="checkbox"/> Yes (if yes, please fill the following information) |
|                                        |                | Repair price                                                                                                |
| Material                               | Type of damage |                                                                                                             |
| Plastic                                | Sliding        |                                                                                                             |
| Steel                                  | Overturning    |                                                                                                             |
| Other:                                 | Other:         |                                                                                                             |
| Sesimic performance features           |                |                                                                                                             |
| Unanchored                             |                |                                                                                                             |
| Anchored                               |                |                                                                                                             |
|                                        |                | Total cost to repair this component \$                                                                      |

| <b>LIGHTING</b>                        |                                                                                                                                                               |                                                                                                             |
|----------------------------------------|---------------------------------------------------------------------------------------------------------------------------------------------------------------|-------------------------------------------------------------------------------------------------------------|
| Does the building have this component? |                                                                                                                                                               | <input type="checkbox"/> No<br><input type="checkbox"/> Yes (if yes, please fill the following information) |
|                                        |                                                                                                                                                               | Repair price                                                                                                |
| <b>Type</b>                            | <b>Type of damage</b>                                                                                                                                         |                                                                                                             |
| Incandescent                           | Disassembly of rod system at connections with horizontal light fixture, low cycle fatigue failure of the threaded rod, pullout of rods from ceiling assembly. |                                                                                                             |
| Neon                                   | Loss of function                                                                                                                                              |                                                                                                             |
| Other:                                 | Other:                                                                                                                                                        |                                                                                                             |
| <b>Seismic performance features</b>    |                                                                                                                                                               |                                                                                                             |
| Non seismic                            |                                                                                                                                                               |                                                                                                             |
| Seismically rated                      |                                                                                                                                                               |                                                                                                             |
|                                        |                                                                                                                                                               | Total cost to repair this component \$                                                                      |

| <b>POWER GENERATORS</b>                |                                                                      |                                                                                                             |
|----------------------------------------|----------------------------------------------------------------------|-------------------------------------------------------------------------------------------------------------|
| Does the building have this component? |                                                                      | <input type="checkbox"/> No<br><input type="checkbox"/> Yes (if yes, please fill the following information) |
|                                        |                                                                      | Repair price                                                                                                |
| <b>Type</b>                            | <b>Type of damage</b>                                                |                                                                                                             |
| Diesel generator                       | Damaged, inoperative. Pipes and nozzles damaged.                     |                                                                                                             |
| Petrol generator                       | Anchorage failure.                                                   |                                                                                                             |
| Other;                                 | Damaged, inoperative but anchorage is OK. Pipes and nozzles damaged. |                                                                                                             |
| <b>Seismic performance features</b>    |                                                                      |                                                                                                             |
| Unanchored                             |                                                                      |                                                                                                             |
| Anchored                               |                                                                      |                                                                                                             |
|                                        |                                                                      | Total cost to repair this component \$                                                                      |

| <b>TANKS</b>                           |                        |                                                                                                             |
|----------------------------------------|------------------------|-------------------------------------------------------------------------------------------------------------|
| Does the building have this component? |                        | <input type="checkbox"/> No<br><input type="checkbox"/> Yes (if yes, please fill the following information) |
|                                        |                        | Repair price                                                                                                |
| <b>Material</b>                        | <b>Type of damage</b>  |                                                                                                             |
| Plastic                                | Pipe break             |                                                                                                             |
| Metal                                  | Tank or vessel rupture |                                                                                                             |
| Other:                                 | Other:                 |                                                                                                             |
| <b>Seismic performance features</b>    |                        |                                                                                                             |
| Unanchored                             |                        |                                                                                                             |
| Anchored                               |                        |                                                                                                             |
|                                        |                        | Total cost to repair this component \$                                                                      |

| <b>FIXED FURNISHINGS</b>               |                                    |                                                                                                             |
|----------------------------------------|------------------------------------|-------------------------------------------------------------------------------------------------------------|
| Does the building have this component? |                                    | <input type="checkbox"/> No<br><input type="checkbox"/> Yes (if yes, please fill the following information) |
|                                        |                                    | Repair price                                                                                                |
| <b>Type</b>                            | <b>Type of damage</b>              |                                                                                                             |
| Fixed artwork                          | Only sliding, no damage            |                                                                                                             |
| Fixed casework                         | Cracks and crushing. Minor damage. |                                                                                                             |
| Other:                                 | Damaged, loss of function          |                                                                                                             |
| <b>Seismic performance features</b>    |                                    |                                                                                                             |
| Other:                                 |                                    |                                                                                                             |
|                                        |                                    | Total cost to repair this component \$                                                                      |

| <b>BOOKCASE</b>                        |                                                                             |                                                                                                             |
|----------------------------------------|-----------------------------------------------------------------------------|-------------------------------------------------------------------------------------------------------------|
| Does the building have this component? |                                                                             | <input type="checkbox"/> No<br><input type="checkbox"/> Yes (if yes, please fill the following information) |
|                                        |                                                                             | Repair price                                                                                                |
| <b>Material</b>                        | <b>Type of damage</b>                                                       |                                                                                                             |
| Wood                                   | Bookcase slides. Some content fall over. No damage to the bookcase          |                                                                                                             |
| Metal                                  | Book case falls over and contents are scattered. Likely damage to bookcase. |                                                                                                             |
| Other:                                 | Other:                                                                      |                                                                                                             |
| <b>Seismic performance features</b>    |                                                                             |                                                                                                             |
| Unanchored laterally                   |                                                                             |                                                                                                             |
| Anchored laterally                     |                                                                             |                                                                                                             |
|                                        |                                                                             | Total cost to repair this component \$                                                                      |

| <b>FILING CABINET</b>                  |                                                                                      |                                                                                                             |
|----------------------------------------|--------------------------------------------------------------------------------------|-------------------------------------------------------------------------------------------------------------|
| Does the building have this component? |                                                                                      | <input type="checkbox"/> No<br><input type="checkbox"/> Yes (if yes, please fill the following information) |
|                                        |                                                                                      | Repair price                                                                                                |
| <b>Type</b>                            | <b>Type of damage</b>                                                                |                                                                                                             |
| Wood                                   | Sliding. Some content fall over. No damage to the bookcase                           |                                                                                                             |
| Metal                                  | Filing cabinet falls over and contents are scattered. Likely damage to file cabinet. |                                                                                                             |
| Other:                                 | Other:                                                                               |                                                                                                             |
| <b>Seismic performance features</b>    |                                                                                      |                                                                                                             |
| Unanchored                             |                                                                                      |                                                                                                             |
| Anchored                               |                                                                                      |                                                                                                             |
|                                        |                                                                                      | Total cost to repair this component \$                                                                      |

| <b>DESK</b>                            |                                                                                      |                                                                                                             |
|----------------------------------------|--------------------------------------------------------------------------------------|-------------------------------------------------------------------------------------------------------------|
| Does the building have this component? |                                                                                      | <input type="checkbox"/> No<br><input type="checkbox"/> Yes (if yes, please fill the following information) |
|                                        |                                                                                      | Repair price                                                                                                |
| <b>Type</b>                            | <b>Type of damage</b>                                                                |                                                                                                             |
| Wood                                   | Sliding. Some content fall over. No damage to the bookcase                           |                                                                                                             |
| Metal                                  | Filing cabinet falls over and contents are scattered. Likely damage to file cabinet. |                                                                                                             |
| Other:                                 | Other:                                                                               |                                                                                                             |
| <b>Seismic performance features</b>    |                                                                                      |                                                                                                             |
| Unanchored                             |                                                                                      |                                                                                                             |
| Anchored                               |                                                                                      |                                                                                                             |
|                                        |                                                                                      | Total cost to repair this component \$                                                                      |

| DESKTOP COMPUTER UNITS                 |                                    |                                                                                                             |
|----------------------------------------|------------------------------------|-------------------------------------------------------------------------------------------------------------|
| Does the building have this component? |                                    | <input type="checkbox"/> No<br><input type="checkbox"/> Yes (if yes, please fill the following information) |
|                                        |                                    | Repair price                                                                                                |
| Type                                   | Type of damage                     |                                                                                                             |
| Fixed artwork                          | Only sliding, no damage            |                                                                                                             |
| Fixed casework                         | Cracks and crushing. Minor damage. |                                                                                                             |
| Other:                                 | Damaged, loss of function          |                                                                                                             |
| Seismic performance features           |                                    | Other:                                                                                                      |
|                                        |                                    | Total cost to repair this component \$                                                                      |

| TV SETS                                |                                    |                                                                                                             |
|----------------------------------------|------------------------------------|-------------------------------------------------------------------------------------------------------------|
| Does the building have this component? |                                    | <input type="checkbox"/> No<br><input type="checkbox"/> Yes (if yes, please fill the following information) |
|                                        |                                    | Repair price                                                                                                |
| Type                                   | Type of damage                     |                                                                                                             |
| Cathodic panel display                 | Only sliding, no damage            |                                                                                                             |
| Flat panel display                     | Cracks and crushing. Minor damage. |                                                                                                             |
| Other:                                 | Damaged, loss of function          |                                                                                                             |
| Seismic performance features           |                                    | Other:                                                                                                      |
| Unanchored                             |                                    |                                                                                                             |
| Anchored                               |                                    |                                                                                                             |
|                                        |                                    | Total cost to repair this component \$                                                                      |

Building owner contact information:

---

Name of contractors/subcontractors involved in the repairs:

**Building sketch**

**Pictures (please indicate the name of the first and last picture taken for this building)**
